# Supplementary material for: Dose escalation of radiotherapy in unresectable extrahepatic cholangiocarcinoma
Source: PubMed Central journal article supplement (PMC6198206; doi:10.1002/cam4.1734), 2018-08-27

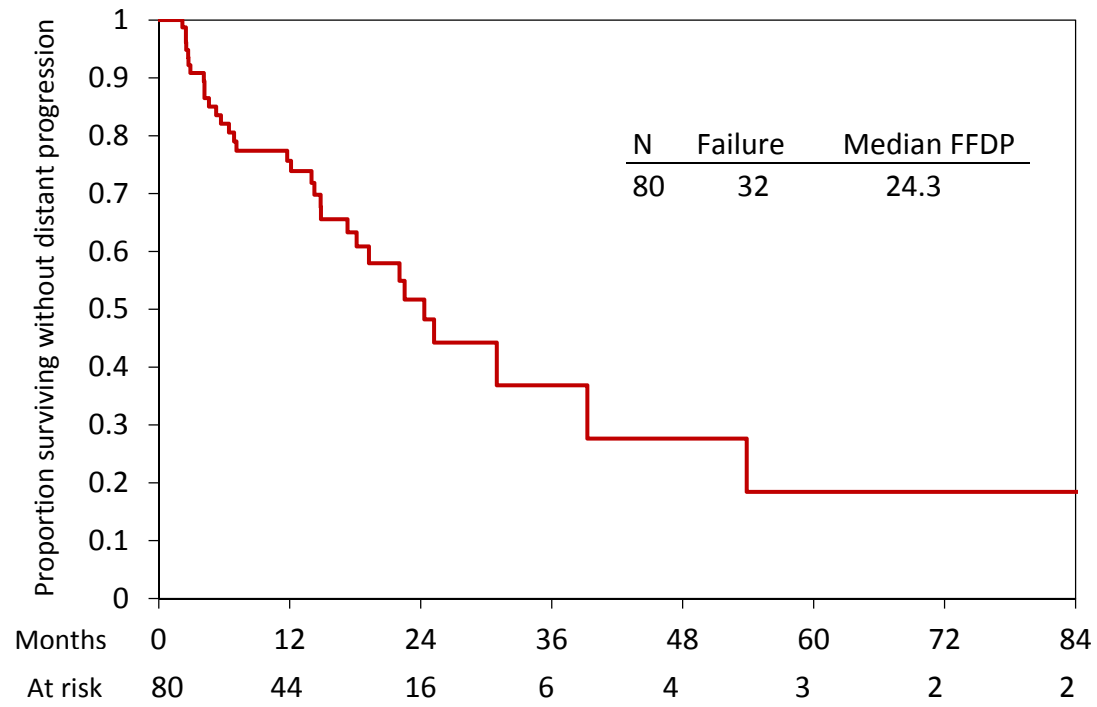

Supplement: CAM4-7-4880-s002.pdf [file CAM4-7-4880-s002.pdf]
